# Supplementary material for: rad21 Is Involved in Corneal Stroma Development by Regulating Neural Crest Migration
Source: MDPI journal article supplement (doi:10.3390/ijms21207807), 2020-10-21
Supplement: s1 [file s1]

Affected (2 cell lines) relative to unaffected (3 cell lines)

| RNAseq          |            |                                        | Taq-Man qPCR |                                        |
|-----------------|------------|----------------------------------------|--------------|----------------------------------------|
| Gene name       | Regulation | Fold change<br>(after Log2 processing) | Regulation   | Fold change<br>(after Log2 processing) |
| <i>SEPT10</i>   | Up         | 2.60                                   | Up           | 2.94±0.03                              |
| <i>PCDHGC3</i>  | Up         | 1.36                                   | Up           | 0.81±0.11                              |
| <i>RPS18</i>    | Up         | 0.87                                   | Up           | 0.24±0.11                              |
| <i>CCZ1</i>     | Up         | 1.17                                   | Up           | 0.3±0.06                               |
| <i>SLFN12L</i>  | Up         | 1.06                                   | Up           | 1.82±0.53                              |
| <i>RPS3A</i>    | Up         | 0.71                                   | Up           | 0.82±0.63                              |
| <i>GTSF1</i>    | Down       | -3.84                                  | Down         | -4.5±1.13                              |
| <i>IL32</i>     | Down       | -2.08                                  | Down         | -1.4±0.73                              |
| <i>ARHGAP44</i> | Down       | -2.40                                  | Down         | -1.09±0.61                             |
| <i>GOLGA8B</i>  | Down       | -1.49                                  | Down         | -1.43±0.3                              |
