# Supplementary figures and images for: rad21 Is Involved in Corneal Stroma Development by Regulating Neural Crest Migration
Source: MDPI journal article supplement (doi:10.3390/ijms21207807), 2020-10-21

**a**

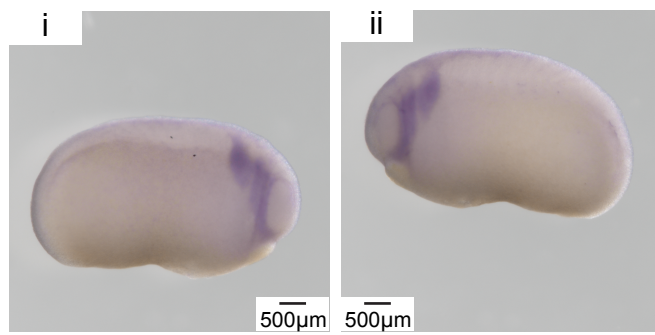

**b**

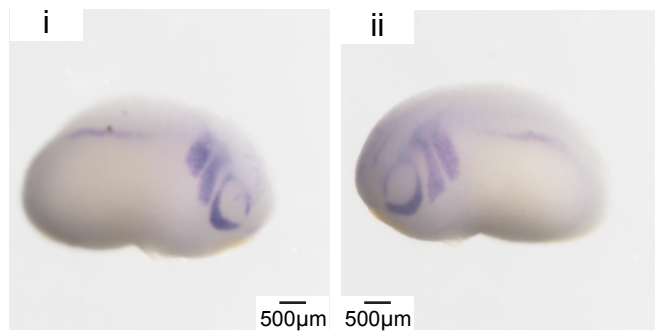

Supplement: s1 [file s1]

**a**

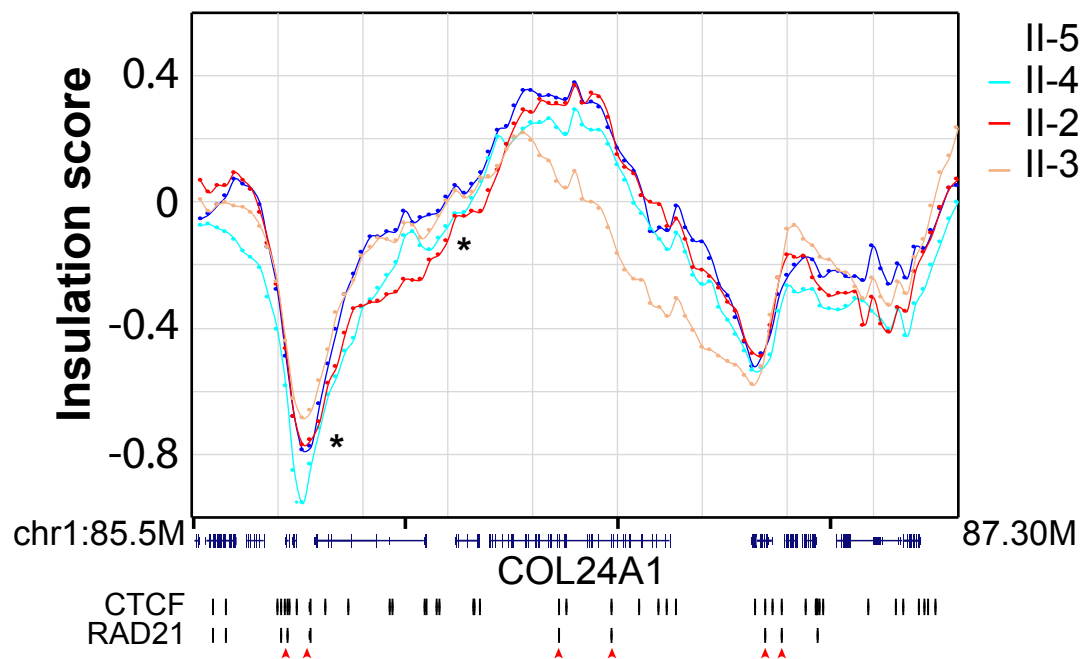

**b**

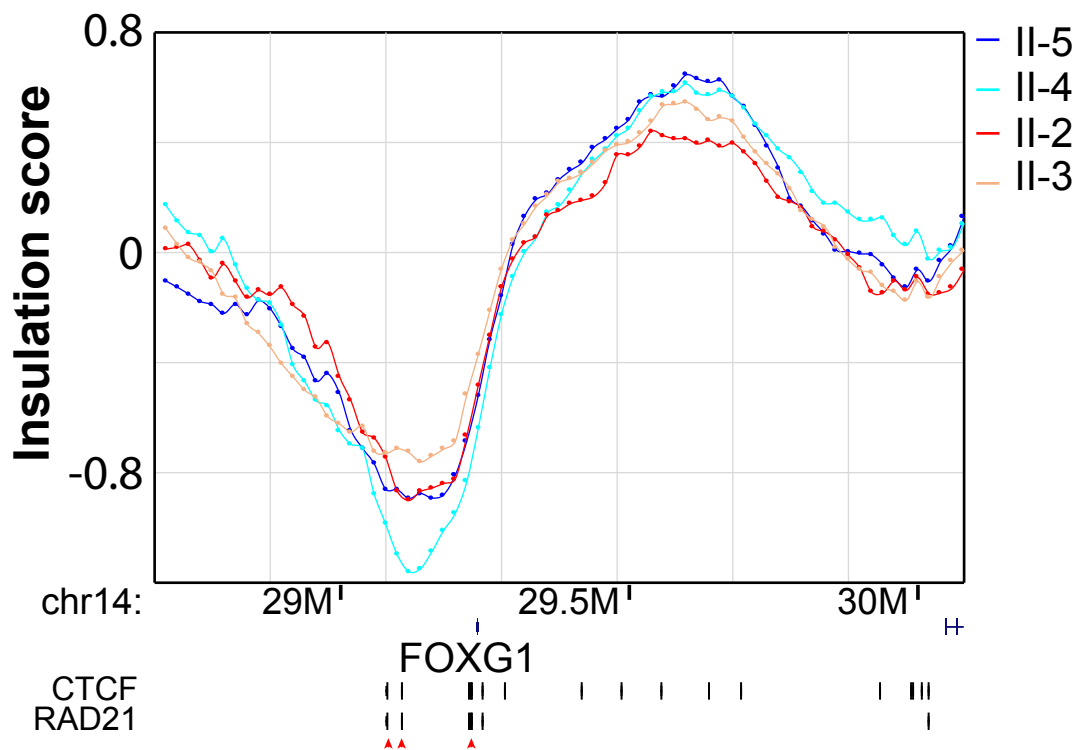

Supplement: s1 [file s1]

**a**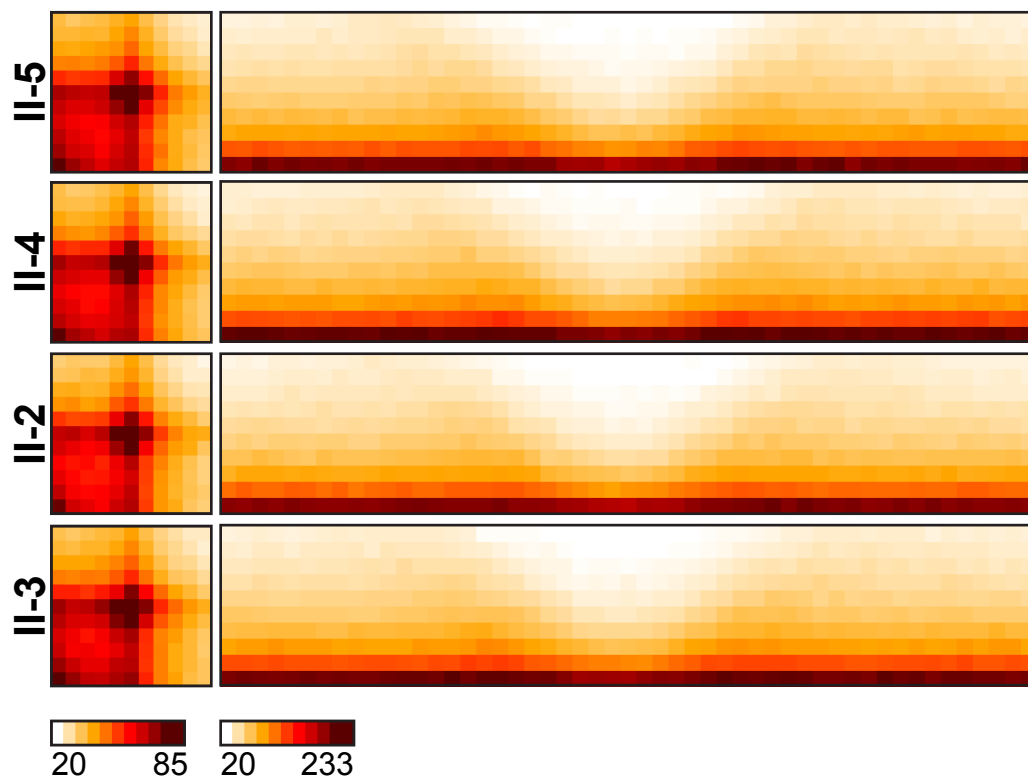**b**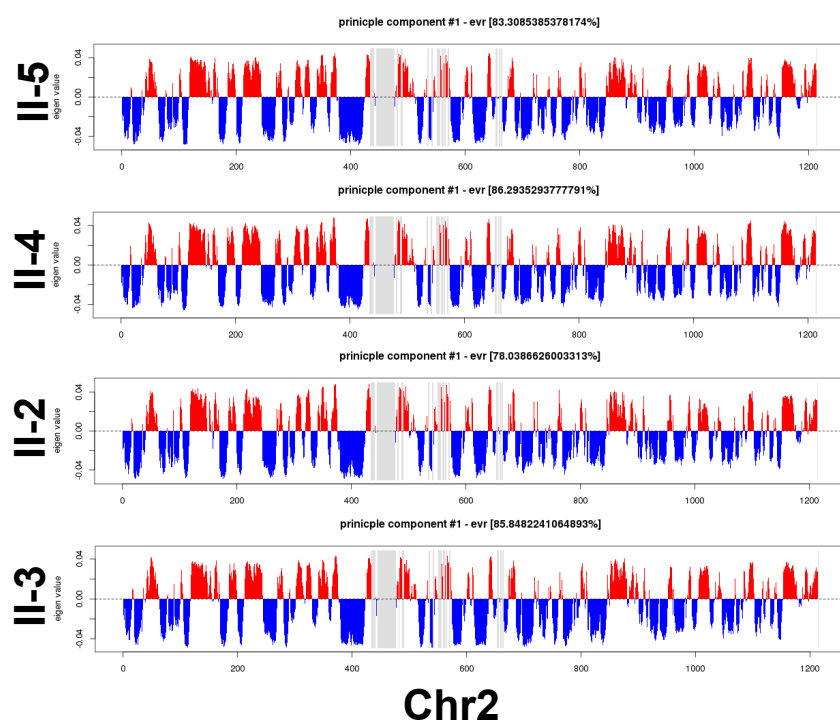

Supplement: s1 [file s1]
